# Supplementary material
Source: PubMed Central journal article supplement (PMC3179043)
Supplement: 1106704108_pnas.201106704SI.pdf [file 1106704108_pnas.201106704SI.pdf]

# Supporting Information

Vlasi et al. 10.1073/pnas.1106704108

## SI Materials and Methods

**Western Blotting.** Cells were lysed on ice using Mammalian Protein Extraction Reagent (Thermo Scientific). The lysate was centrifuged at  $10,000 \times g$  for 10 min, and the protein concentration in the supernatant was determined using the MicroBCA protocol (Pierce, Thermo Scientific). The protein lysate was separated by SDS/PAGE and then transferred to PVDF

membranes (BioRad). The membranes were blocked with 5% BSA/Tris buffered saline with Tween 20 (TBS-T) and then probed with rabbit anti-PK-M1/PK-M2 primary antibodies (1:2,000) (15) for 1 h at room temperature. After washing, the blots were incubated with an anti-rabbit HRP-conjugated secondary antibody (1:5,000) (GE Healthcare) and visualized by ECL Plus Membrane Blotting detection System (GE Healthcare).

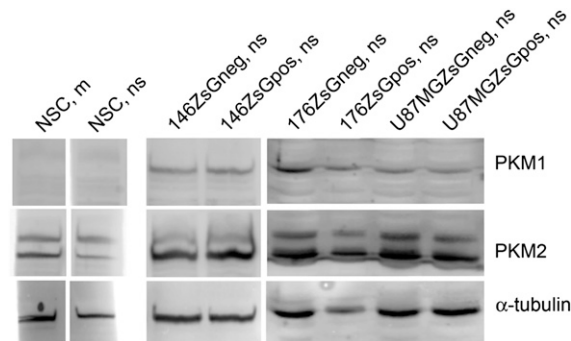

**Fig. S1.** Expression of PK-M1 and PK-M2 in subpopulations of glioma cells in neurospheres. GSCs and progenitor cells from GBM-146, GBM-176, and U87MG neurospheres expressed both isoforms of pyruvate kinase, PK-M1 and PK-M2. In contrast, normal neuronal stem cells (NSCs) lacked expression of PK-M1.

**Table S1. Cell populations**

| Parameter              | Monolayer cultures                    | Neurospheres                           | Differentiated cells                   | Progenitor cells                           | Stem cells                                |
|------------------------|---------------------------------------|----------------------------------------|----------------------------------------|--------------------------------------------|-------------------------------------------|
| Proteasome activity    | High                                  | Low                                    | High                                   | Low                                        | Very low                                  |
| ZsGreen-positive cells | Mainly ZsGreen-negative, <1% positive | Mainly ZsGreen-negative, <10% positive | ZsGreen-negative                       | Mainly ZsGreen-negative or weakly positive | Highly positive for ZsGreen               |
| Source                 | Unsorted                              | Unsorted                               | ZsGreen-negative sorted from monolayer | ZsGreen-negative sorted from neurospheres  | ZsGreen-positive sorted from neurospheres |
